# Supplementary material
Source: PubMed Central journal article supplement (PMC3811549)
Supplement: AEM.01978-13_zam999104855so1.pdf [file AEM.01978-13_zam999104855so1.pdf]

## Supplemental material

```
TvaF : -MAEHDAAAEGLQLTITMCLSGSVSSVAGPHMAAWSSAG-VGRLHVALTPSAQQFVVTNSLRPFVNGSVLTDET-V-W : 76
MibD : MTAHSDAGGDRPPPERLLLGVSQSVAAALNLPAYTYAFRAAG-VARLAVVLPAAEGFLPAGALRPIVDAVHTEHD---- : 74
EpiD : -----MYGKLLICATASINVININHYIVEIKQH--FDEVNILEFSSSKNFINTDVLKLFCDNLYDEIKD--- : 62
CypD : -----MNVEKFEGAELEHVHVTGSLISAALVPEWVHWLREFQPELVVNVSVLPAASTRFLAVRALRHLKLANGVWVDSWDDP : 73
```

```
TvaF : SAGGAPVIRIAAESDAVVVAPATAATLGKLANGICDNIIVTQIVMAAECVILAFVMNPAMLAKFAVRRNLDALRAEGFV : 155
MibD : --QGKGVVALSRWAQHLLVLPATANLLGCAASGLAPNFLATVLLAADCPITFVQAMNPVWWRKFAVRRNVATLRADGHH : 151
EpiD : --PLLNINIVENHEYILVLPASANTINKIANGICDNLTLTVCLTGYQKLFIFENMNIIRWGNFLOKKNIDLLKNNVVK : 139
CypD : DVPPEVNSGKSGASECFVPEPATLDTVMRLAQCRAQSPALMMLQLTDAPLVIADTFPG---SNEIVENNVQTLKLRPNV : 149
```

```
TvaF : VAEFGQ-----GVTATN-GRWEAC-SMADFRSVFAVALKSAERKSAS----- : 196
MibD : VVDPLPGAVYEAAARSIVEGLAMPREALVRLGCGDDGS-PAGPAC-PVGRAEHVGAVEAVEAVEAVEAVEAAEALA : 227
EpiD : VYSPDMN-----KSFETSS-GRYKNNITMPNIENVLNLFVLNNEKRPLD----- : 181
CypD : EFAPRVN-----GVRASNRQTAEVCFNLPGALAAANRMRKEGRSGE----- : 190
```

**FIG S1** Sequence alignment of TvaF with AviCys forming enzymes. MibD (Accession number: ADK32557), EpiD (P30197) and CypD (ADR72965) are involved in the biosynthesis of microbisporicin, epidermin and cypemycin, respectively. Amino acid sequence alignment was carried out using CLUSTAL W multiple sequence alignment program (version 2.1) (2) and edited with GeneDoc (version 2.7) (1).

**Isolation of thioviridamide.** The fermentation broth (1 liter) was centrifuged and the mycelium was extracted with acetone. The extract was evaporated and then extracted with EtOAc at pH 3. The extract was applied to a silica gel column, which was washed with CHCl<sub>3</sub> - MeOH (10:1) and eluted with CHCl<sub>3</sub> - MeOH (5:1). The eluate was subjected to HPLC (YMC-Pack D-ODS-7; YMC, Kyoto, Japan) with 85% MeOH - 5 mM disodium hydrogen citrate. The corresponding peak fraction was concentrated and then partitioned between EtOAc and water. The organic layer was washed with 0.01 M HCl and water. The EtOAc solution was dried over anhydrous sodium sulfate and evaporated to dryness to give a pure powder of thioviridamide.

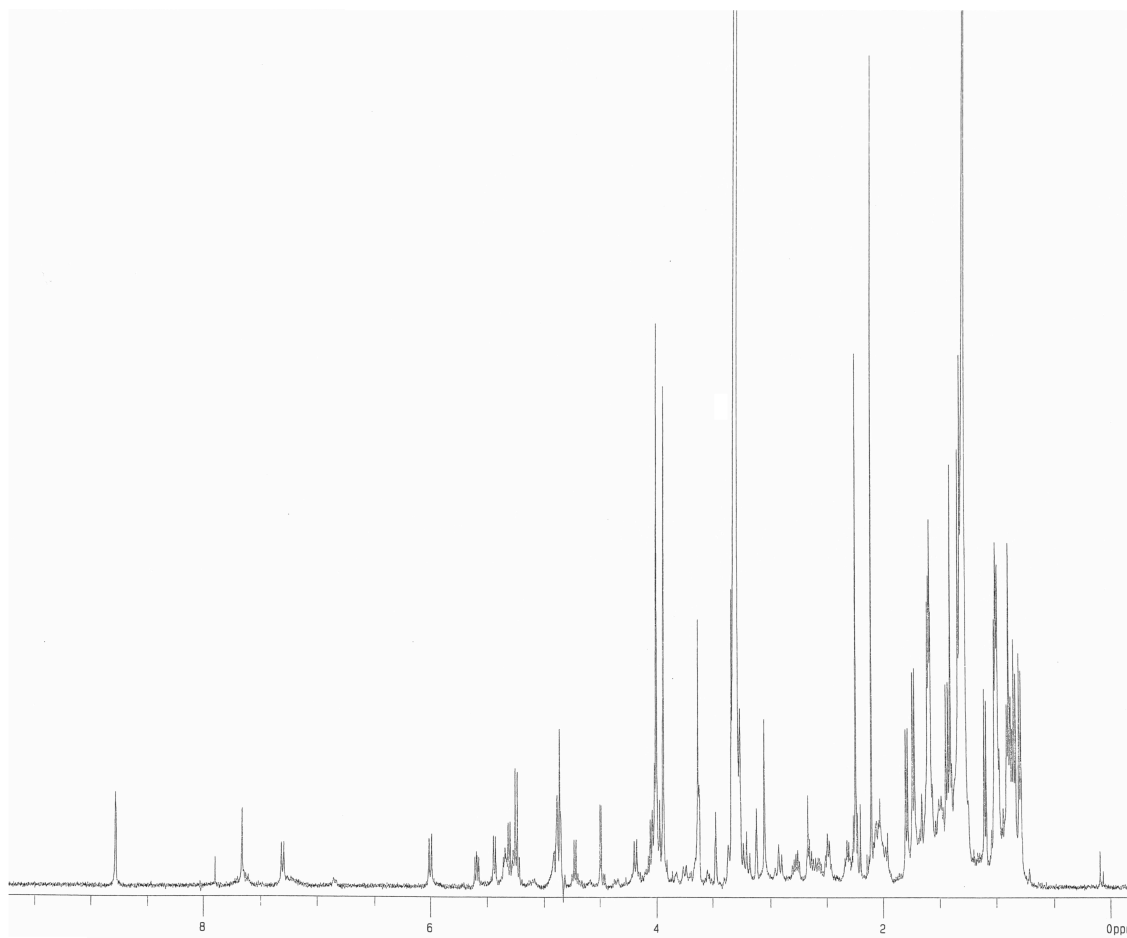

**FIG S2** <sup>1</sup>H NMR spectrum of thioviridamide produced by *S. lividans* expressing the *tva* gene cluster.

<sup>1</sup>H NMR spectrum was obtained in CD<sub>3</sub>OD on a JEOL JNM-LA400 spectrometer at 400 MHz.

**TABLE S1** Bacterial strains and plasmids used in this study

| Strain and plasmid              | Relevant characteristics                                                                                                                                                                                               |
|---------------------------------|------------------------------------------------------------------------------------------------------------------------------------------------------------------------------------------------------------------------|
| <i>Streptomyces</i> strains     |                                                                                                                                                                                                                        |
| <i>S. olivoviridis</i> NA05001  | Thioviridamide producer                                                                                                                                                                                                |
| <i>S. lividans</i> TK23         | Heterologous host for thioviridamide production                                                                                                                                                                        |
| <i>Escherichia coli</i> strains |                                                                                                                                                                                                                        |
| XL1-blue MR                     | Strain for cosmid library construction; $\Delta(mcrA)183$<br>$\Delta(mcrCB-hsdSMR-mrr)173$ <i>endA1 supE44 thi-1 recA1 gyrA96 relA1 lac</i>                                                                            |
| XL1-blue MRF'                   | Cloning host; $\Delta(mcrA)183$ $\Delta(mcrCB-hsdSMR-mrr)173$ <i>endA1</i><br><i>supE44 thi-1 recA1 gyrA96 relA1 lac</i> [F' <i>proAB lacI<sup>f</sup>Z</i> $\Delta$ M15 Tn10 ( <i>Tet<sup>r</sup></i> )]              |
| JM110                           | <i>dam/dcm</i> methylases deficient strain; <i>dam dcm supE44 hsdR17 thi leu</i><br><i>rpsL1 lacY galK galT ara tonA thr tsx</i> $\Delta(lac-proAB)$ [F' <i>traD36 proAB</i><br><i>lacI<sup>f</sup>Z</i> $\Delta$ M15] |
| Plasmids                        |                                                                                                                                                                                                                        |
| pWE15                           | General cosmid vector for a genomic library of <i>S. olivoviridis</i> NA05001.                                                                                                                                         |
| pGEM-11Z                        | General cloning vector with multiple cloning sites for cloning of a 0.8-kbp <i>tvaJ</i> fragment into the HindIII site.                                                                                                |
| pBluescript II SK (+)           | General cloning vector with multiple cloning sites for cloning of a 2.0-kbp <i>tvaA</i> fragment into the EcoRI/XbaI sites and cloning of the <i>tva</i> gene cluster (16.6-kbp) into the XbaI/HindIII sites.          |
| pWHM3                           | <i>E. coli</i> / <i>Streptomyces</i> shuttle vector for cloning and expression of the <i>tva</i> gene cluster.                                                                                                         |

## Supplemental References

1. **Nicholas, K. B., H. B. Nicholas, and D. W. Derrfield.** 1997. GeneDoc: analysis and visualization of genetic variation. *EMBNEW NEWS* **4**:14.
2. **Thompson, J. D., D. G. Higgins, and T. J. Gibson.** 1994. CLUSTAL W: improving the sensitivity of progressive multiple sequence alignment through sequence weighting, position-specific gap penalties and weight matrix choice. *Nucleic Acids Res* **22**:4673-80.
